# Supplementary material
Source: MDPI journal article supplement (https://www.mdpi.com/1999-4907/13/2/163)
Supplement: s1 [file s1]

# Low frequency of plants associated with symbiotic nitrogen-fixers exhibits high frequency of free-living nitrogen fixing bacteria: A study in karst shrub ecosystems of Southwest China

Yueming Liang <sup>1</sup>·Xunyang He <sup>2,3</sup>· Xiangbi Chen <sup>2,3</sup>·Yirong Su <sup>2,3\*</sup>·Fujing Pan<sup>4</sup> Lening Hu<sup>1,2,5</sup>

**Table S1.** Plot basic information.

| Plot   | Longitude       | Latitude       | Ascent | Slope position | Aspect    |
|--------|-----------------|----------------|--------|----------------|-----------|
| Plot1  | 108° 02' 19.60" | 24° 57' 20.23" | 39°    | Lower          | Southeast |
| Plot2  | 108° 03' 26.08" | 24° 57' 56.51" | 40°    | Lower          | Southeast |
| Plot3  | 108° 03' 42.55" | 24° 57' 56.69" | 34°    | Lower          | Southeast |
| Plot4  | 108° 18' 13.04" | 24° 45' 57.74" | 25°    | Lower          | Southeast |
| Plot5  | 108° 18' 07.20" | 24° 45' 56.16" | 26°    | Lower          | Southeast |
| Plot6  | 108° 19' 33.75" | 24° 44' 22.39" | 28°    | Lower          | Southeast |
| Plot7  | 107° 57' 51.81" | 25° 04' 05.28" | 42°    | Lower          | Southeast |
| Plot8  | 107° 57' 49.66" | 25° 04' 07.57" | 42°    | Lower          | Southeast |
| Plot9  | 107° 57' 50.49" | 25° 04' 01.07" | 45°    | Lower          | Southeast |
| Plot10 | 108° 18' 05.00" | 24° 45' 54.30" | 29°    | Middle         | Southeast |
| Plot11 | 108° 18' 07.56" | 24° 45' 54.44" | 33°    | Middle         | Southeast |
| Plot12 | 108° 17' 57.88" | 24° 45' 43.06" | 30°    | Middle         | Southeast |
| Plot13 | 108° 18' 08.95" | 24° 45' 52.28" | 50°    | Upper          | Southeast |
| Plot14 | 108° 18' 07.55" | 24° 45' 51.13" | 28°    | Upper          | Southeast |
| Plot15 | 108° 18' 12.95" | 24° 45' 54.37" | 35°    | Upper          | Southeast |
| Plot16 | 108° 18' 01.04" | 24° 46' 05.11" | 27°    | Lower          | East      |
| Plot17 | 108° 18' 18.24" | 24° 45' 35.36" | 16°    | Lower          | East      |
| Plot18 | 108° 19' 32.75" | 24° 44' 43.38" | 42°    | Lower          | East      |
| Plot19 | 108° 18' 52.25" | 24° 44' 14.21" | 25°    | Lower          | South     |
| Plot20 | 108° 18' 04.13" | 24° 46' 10.47" | 22°    | Lower          | South     |
| Plot21 | 108° 18' 19.95" | 24° 46' 00.01" | 31°    | Lower          | South     |
